# Supplementary material
Source: publisher site journal article supplement (https://en-cdn.bio-protocol.org/attached/file/20190624/3283%20Supplementary%20File%201.docx)
Supplement: Supplementary file 1 [file 3283%20Supplementary%20File%201.docx]

Supplementary File 1. Code to perform steps 1-5 in the data analysis

#! /bin/bash

SHORT_SAMPLE="short_sample_name"

FULL_RUN="full_run_name"

TYPE="type_name"

### Demultiplex the base call (.bcl) files to .fastq files with Illumina bcl2fastq v2.19 script ###

### unzip fastq files ##

gunzip -c /nexusb/REGE/mito/$FULL_RUN/$SHORT_SAMPLE/$SHORT_SAMPLE\_*R1*.fastq.gz > /nexusb/REGE/mito/$FULL_RUN/$SHORT_SAMPLE/$SHORT_SAMPLE\_R1.fastq

gunzip -c /nexusb/REGE/mito/$FULL_RUN/$SHORT_SAMPLE/$SHORT_SAMPLE\_*R2*.fastq.gz > /nexusb/REGE/mito/$FULL_RUN/$SHORT_SAMPLE/$SHORT_SAMPLE\_R2.fastq

### extract 750000 random reads from both R1 and R2 fastq ###

/nexus/dorien/tools/seqtk-master/seqtk sample -s 100 /nexusb/REGE/mito/$FULL_RUN/$SHORT_SAMPLE/$SHORT_SAMPLE\_R1.fastq 750000 > /nexusb/REGE/mito/$FULL_RUN/$SHORT_SAMPLE/$SHORT_SAMPLE\_downsample_R1.fastq

/nexus/dorien/tools/seqtk-master/seqtk sample -s 100 /nexusb/REGE/mito/$FULL_RUN/$SHORT_SAMPLE/$SHORT_SAMPLE\_R2.fastq 750000 > /nexusb/REGE/mito/$FULL_RUN/$SHORT_SAMPLE/$SHORT_SAMPLE\_downsample_R2.fastq

### standard mito pipeline on downsampled fastq's##

# bwa pipeline for mapping #

ls /nexusb/REGE/mito/$FULL_RUN/$SHORT_SAMPLE/$SHORT_SAMPLE\_downsample_R*.fastq | /home/ngs/installed/mito_analysis_pipeline/binaries/mito_analysis_pipeline_v4.0/bwa-pipeline -tn 8 -re /home/ngs/data/tools/mitoanalyser/chrM/Mito.fasta -id $SHORT_SAMPLE -wd /nexusb/REGE/mito/$FULL_RUN/aligned -n r -mem

# post mapping pipeline for realignment and base recalibration

/home/ngs/installed/mito_analysis_pipeline/binaries/mito_analysis_pipeline_v4.0/post-mapping-pipeline_2.0 -in /nexusb/REGE/mito/$FULL_RUN/aligned/$SHORT_SAMPLE\_sorted.bam -gp ~ngs/installed/gatk/GenomeAnalysisTK-3.3/ -wd /nexusb/REGE/mito/$FULL_RUN/aligned/post/ -tn 8 -n r -mito -re /home/ngs/data/tools/mitoanalyser/chrM/Mito.fasta -gr /home/ngs/data/tools/mitoanalyser/ -rd no

### mutect2 for variant calling ###

/usr/java/jre1.8.0*/bin/java -Xmx45g -jar /home/ngs/installed/gatk/GenomeAnalysisTK-3.6/GenomeAnalysisTK.jar -T MuTect2 -R /home/ngs/data/tools/mitoanalyser/chrM/Mito.fasta -I:tumor /nexusb/REGE/mito/$FULL_RUN/aligned/post/$SHORT_SAMPLE\_sorted_realigned_recal.bam -o /nexusb/REGE/mito/$FULL_RUN/aligned/post/vcf/$SHORT_SAMPLE\_mutect.vcf

/home/ngs/installed/mito_analysis_pipeline/binaries/mito_analysis_pipeline_v4.0/mito_annovar_annotate -in /nexusb/REGE/mito/$FULL_RUN/aligned/post/vcf/$SHORT_SAMPLE\_mutect.vcf -re /home/ngs/data/tools/mitoanalyser/chrM/Mito.fasta -gp ~ngs/installed/gatk/GenomeAnalysisTK-3.3/ -maf /home/ngs/data/tools/mitoanalyser//annovar/m*.txt -od /nexusb/REGE/mito/$FULL_RUN/aligned/post/vcf/annovar/ -n r

### coverage calculations ###

mkdir /nexusb/REGE/mito/$FULL_RUN/aligned/post/$TYPE/coverage/

~ngs/installed/samtools/samtools-0.1.18/samtools mpileup -d 10000000 -ABQ0 -f /home/ngs/data/tools/mitoanalyser/chrM/Mito.fasta /nexusb/REGE/mito/$FULL_RUN/aligned/post/$SHORT_SAMPLE\_sorted_realigned_recal.bam > /nexusb/REGE/mito/$FULL_RUN/aligned/post/$TYPE/coverage/$SHORT_SAMPLE\_mpileup.txt

~ngs/scripts/python/perbase-coverage.py -a -f /nexusb/REGE/mito/$FULL_RUN/aligned/post/$TYPE/coverage/$SHORT_SAMPLE\_mpileup.txt > /nexusb/REGE/mito/$FULL_RUN/aligned/post/$TYPE/coverage/$SHORT_SAMPLE\_cpb.txt
